# Supplementary material for: Fabrication of a highly dispersed Co3O4-modified MOF-derived ZnO@ZnS porous heterostructure for efficient photocatalytic hydrogen production
Source: Royal Society of Chemistry journal article supplement (doi:10.1039/d2ce01663j), 2023-01-01
Supplement: d2ce01663j1.pdf [file d2ce01663j1.pdf]

# **Fabrication of highly dispersed $\text{Co}_3\text{O}_4$ modified MOFs derived $\text{ZnO}@\text{ZnS}$ porous heterostructure for efficient photocatalytic hydrogen production**

Wen Wang, Weiming Xiao\*, Yuxin Zhu, Sanmei Liu, Shuhua Wang, and  
Chao Chen\*

*Key Laboratory of Jiangxi Province for Environment and Energy Catalysis,  
School of Chemistry and Chemical Engineering, Nanchang University,  
Nanchang 330031, P. R. China.*

*E-mail: [chaochen@ncu.edu.cn](mailto:chaochen@ncu.edu.cn); [xiaoweiming@ncu.edu.cn](mailto:xiaoweiming@ncu.edu.cn)*

## Experimental

### Materials

Absolute ethanol, methanol, thioacetamide ( $\text{CH}_3\text{CSNH}_2$ , TAA), Zinc nitrate hexahydrate ( $\text{Zn}(\text{NO}_3)_2 \cdot 6\text{H}_2\text{O}$ ), Cobalt nitrate hexahydrate ( $\text{Co}(\text{NO}_3)_2 \cdot 6\text{H}_2\text{O}$ ), Chloroplatinic acid hexahydrate ( $\text{H}_2\text{PtCl}_6 \cdot 6\text{H}_2\text{O}$ ) were purchased from Sinopharm Chemical Reagent Co., Ltd. 2-Methylimidazole (2-MI) was provided by J&K Co., Ltd. All the reagents were used without further purification.

### Preparation of photocatalysts

#### Synthesis of ZnCo-ZIF and ZnCo-ZIF@ZIF-8

The ZnCo-ZIF was synthesized according to the literature<sup>1</sup>. Briefly, 2.0824 g (7.0 mmol)  $\text{Zn}(\text{NO}_3)_2 \cdot 6\text{H}_2\text{O}$  and 0.2910 g (1.0 mmol)  $\text{Co}(\text{NO}_3)_2 \cdot 6\text{H}_2\text{O}$  were dissolved in 66.4 mL anhydrous methanol to obtain the Zn-Co-MeOH solution. At the same time, 2.6275 g (32.0 mmol) 2-MI was added to another 66.4 mL anhydrous methanol to give the 2-MI-MeOH solution. Then, the Zn-Co-MeOH solution was poured into the 2-MI-MeOH solution under magnetic stirring. After stirring at room temperature for 20 minutes, it was sealed with plastic wrap and aged for 24 hours. Subsequently, the product was obtained by centrifugation, washed three times with ethanol and dried. The final product was named as ZnCo-ZIF.

To prepare the ZnCo-ZIF@ZIF-8, the obtained ZnCo-ZIF and 2.6275 g (32.0 mmol) 2-MI were added in 100.0 mL of anhydrous methanol. Then the  $\text{Zn}(\text{NO}_3)_2$  solution (2.3799 g  $\text{Zn}(\text{NO}_3)_2 \cdot 6\text{H}_2\text{O}$  in 22.8 mL of methanol,) was added dropwise into the above solution under stirring. After the addition, the mixture was stirred at room temperature for another 20 minutes, then sealed with plastic wrap and aged for 4 hours. Finally, the ZnCo-ZIF@ZIF-8 was acquired by centrifugation, washed three times with ethanol, and dried in an oven.

ZIF-8 was prepared by a similar method of ZnCo-ZIF without using the  $\text{Co}(\text{NO}_3)_2 \cdot 6\text{H}_2\text{O}$ .

#### Synthesis of $\text{Co}_3\text{O}_4$ -ZnO and $\text{Co}_3\text{O}_4$ -ZnO@ZnS

The acquired light purple ZnCo-ZIF@ZIF-8 was put into a muffle furnace heating up to 500°C at a heating rate of 2°C/min in air for 3h. After cooling to room temperature, the  $\text{Co}_3\text{O}_4$ -ZnO sample was obtained. The  $\text{Co}_3\text{O}_4$ -ZnO@ZnS was prepared by direct sulfurization of  $\text{Co}_3\text{O}_4$ -ZnO. 0.2 g  $\text{Co}_3\text{O}_4$ -ZnO sample and 1.0 g thioacetamide (TAA) were dispersed in a round-bottom flask containing 100 mL of water by sonicating, then the reaction was carried out in an oil bath at 75°C for 1 h. The precipitates were collected by centrifugation and washed with deionized water three times, then dried in an oven at 60°C to obtain  $\text{Co}_3\text{O}_4$ -ZnO@ZnS sample.

For comparison, ZnO, ZnS, ZnO@ZnS were prepared by this similar method except that  $\text{Co}_3\text{O}_4$ -ZnO was replaced by ZIF-8.

#### Synthesis of $\text{Co}_3\text{O}_4$ -ZnO@ZnS/Pt

Pt was loaded on the  $\text{Co}_3\text{O}_4$ -ZnO@ZnS by the photodeposition method<sup>2</sup>. 0.13 g  $\text{Co}_3\text{O}_4$ -ZnO@ZnS sample was dispersed in a mixed solution of 45.0 mL water and 5.0 mL methanol. 330  $\mu\text{L}$  chloroplatinic acid aqueous solution (10 mg/mL) was diluted with 6.0 mL water, and then added dropwise to the  $\text{Co}_3\text{O}_4$ -ZnO@ZnS suspension with stirring under illumination. After the addition,

the photodeposition was further stirred for 45 minutes under the light. Finally, the precipitate was collected by centrifugation and washed 3 times with deionized water, then dried in an oven at 60°C to obtain the Co<sub>3</sub>O<sub>4</sub>-ZnO@ ZnS/Pt sample.

### Material Characterization

Powder X-ray diffraction (PXRD) patterns were recorded using a Puxi DX-3 diffractometer (operating at 40 kV and 30 mA) with Cu K $\alpha$  radiation. Scanning electron microscopy (SEM) images were obtained on a field emission scanning electron microscopy JSM 6701F. Transmission electron microscope (TEM) and high-resolution TEM (HRTEM) images were acquired by a JEOL JEM-2010F. The metal contents were determined by inductively coupled plasma emission spectroscopy (ICP-OES, Agilent-5100). X-ray photoelectron spectroscopy analyzer (XPS, ThermoFischer, ESCALAB 250Xi 12.5 kV) was used to analyze the surface state of the catalysts with Al K $\alpha$  source. Electrochemical impedance spectroscopy (EIS) experiments and Mott-Schottky plot were measured via a Princeton electrochemical workstation (PARSTAT MC 500, America) by a three-electrode system in 0.1 M Na<sub>2</sub>SO<sub>4</sub> electrolyte solution. The UV-vis absorption spectra were tested via a UV-vis spectrophotometer using a Halon plate reference (Agilent, Cary 60 UV-Vis). Photoluminescence (PL) spectra were obtained in the spectral range of 200-800 nm under the excitation wavelength of 251 nm with a slit width of 0.5 (Hitachi-F7000). Photocurrent transient responses were recorded at the potential of 0.1 V vs Ag/AgCl in 0.1 M Na<sub>2</sub>SO<sub>4</sub> solution (CHI-601). Nitrogen adsorption isotherm was measured on an Autosorb iQ2 analyzer (Quantachrome). The surface area was calculated by the multi-point BET method and the pore diameter was evaluated by the BJH formula.

### Photocatalytic H<sub>2</sub> evolution

Photocatalytic water splitting reactions were conducted in a closed glass system (Perfect Light Labsolar-6A) at 15°C. 50 mg of the photocatalyst was dispersed in 100 mL of Na<sub>2</sub>S-Na<sub>2</sub>SO<sub>3</sub> (35 mM-18 mM) solution. Before starting the test, a vacuum pump was used to remove the air in the system and maintain a vacuum state during the experiment. A 300 W Xe lamp (PLX-300) was used as the light source. The H<sub>2</sub> evolution rate was detected by GC with an interval of 0.5 h (Agilent 8890, with the HP-Plot Molesieve column, TCD, Ar as the carrier).

### Apparent quantum efficiency tests

The AQE of photocatalytic water splitting for H<sub>2</sub> generation was calculated from the amount of H<sub>2</sub> produced and the total number of photons participating in the reaction (Eq. 1). 50 mg of catalyst was dispersed in 100 mL of Na<sub>2</sub>S-Na<sub>2</sub>SO<sub>3</sub> (35 mM-18 mM) solution at a vacuum environment of 15 °C. The incident light source is a 300 W Xe lamp (PLX-300) with a 365 nm band-pass filter. The irradiation range of the incident light is 40.6 cm<sup>2</sup>. The light intensity of the Xe lamp (PLX-300) with a 365 nm band-pass filter is 62.3 mw cm<sup>-2</sup>. The AQE was calculated by using the following formula.

$$AQE = \frac{2 \times \text{Number of Hydrogen}}{\text{Number of incident photons}} \times 100\% \quad (\text{Eq.1})$$

$$\text{Number of incident photons} = \frac{IA\lambda}{hc} \quad (\text{Eq.2})$$

Where  $I$  is incident light intensity,  $A$  is irradiation area,  $\lambda$  is the wavelength of light source,  $h$  is Planck constant and  $c$  is the speed of light.

**Table S1** ICP-OES test results

| Sample                                     | Co (wt%) | Pt (wt%) |
|--------------------------------------------|----------|----------|
| Co <sub>3</sub> O <sub>4</sub> -ZnO        | 3.18     | --       |
| Co <sub>3</sub> O <sub>4</sub> -ZnO@ZnS    | 3.14     | --       |
| Co <sub>3</sub> O <sub>4</sub> -ZnO@ZnS/Pt | 3.09     | 1.72     |

**Table S2** Fluorescence lifetime of ZnO, ZnS, ZnO@ZnS, Co<sub>3</sub>O<sub>4</sub>-ZnO, Co<sub>3</sub>O<sub>4</sub>-ZnO@ZnS and Co<sub>3</sub>O<sub>4</sub>-ZnO@ZnS/Pt.

| Sample                                     | Time      |
|--------------------------------------------|-----------|
| ZnO                                        | 1.3345 ns |
| ZnS                                        | 1.7000 ns |
| ZnO@ZnS                                    | 1.7079 ns |
| Co <sub>3</sub> O <sub>4</sub> -ZnO        | 1.6216 ns |
| Co <sub>3</sub> O <sub>4</sub> -ZnO@ZnS    | 2.7506 ns |
| Co <sub>3</sub> O <sub>4</sub> -ZnO@ZnS/Pt | 3.3361 ns |

**Table S3** The AQEs of Co<sub>3</sub>O<sub>4</sub>-ZnO@ZnS and Co<sub>3</sub>O<sub>4</sub>-ZnO@ZnS/Pt for H<sub>2</sub> generation in 0.35 M Na<sub>2</sub>S, Na<sub>2</sub>SO<sub>3</sub> solution under 365 nm light irradiation.

| 365 nm                                     | H <sub>2</sub> ( $\mu\text{mol g}^{-1} \text{h}^{-1}$ ) | AQE (%) |
|--------------------------------------------|---------------------------------------------------------|---------|
| Co <sub>3</sub> O <sub>4</sub> -ZnO@ZnS    | 41.5                                                    | 7.01    |
| Co <sub>3</sub> O <sub>4</sub> -ZnO@ZnS/Pt | 68.6                                                    | 11.69   |

**Table S4** Comparison of the photocatalytic H<sub>2</sub> evolution rates over different ZnO or ZnS-based materials.

| Materials                                                            | Experimental condition                                                               | H <sub>2</sub> evolution rate               | Reference |
|----------------------------------------------------------------------|--------------------------------------------------------------------------------------|---------------------------------------------|-----------|
| ZnO/ZnS Nanorod                                                      | Simulated sunlight, 10%, glycerol                                                    | 384 $\mu\text{mol h}^{-1} \text{g}^{-1}$    | [3]       |
| ZnS-ZnO/ZnAl-LDH                                                     | UV Pen-Ray, 50%, methanol                                                            | 1599 $\mu\text{mol h}^{-1} \text{g}^{-1}$   | [4]       |
| flower-like ZnO@ZnS                                                  | 300 W Xenon lamp, 10%, methanol                                                      | 757.07 $\mu\text{mol h}^{-1} \text{g}^{-1}$ | [5]       |
| ZnO/ZnS nanobranched decorated with Cu(OH) <sub>2</sub> clusters     | 350 W Xe lamp, 0.35 M Na <sub>2</sub> S/0.25 M Na <sub>2</sub> SO <sub>3</sub>       | 1350 $\mu\text{mol h}^{-1} \text{g}^{-1}$   | [6]       |
| ZnS quantum/ZnO sphere/Bi <sub>4</sub> O <sub>5</sub> I <sub>2</sub> | 300 W Xenon lamp, 20%, methanol                                                      | 578.4 $\mu\text{mol h}^{-1} \text{g}^{-1}$  | [7]       |
| ZnO/ZnS-PdS                                                          | 125 W He lamp, 5% glycerol                                                           | 2141.9 $\mu\text{mol h}^{-1} \text{g}^{-1}$ | [8]       |
| Ce doped ZnO/ZnS                                                     | 500 W Hg-Xe arc lamp, 0.1 M Na <sub>2</sub> S/0.04 M Na <sub>2</sub> SO <sub>3</sub> | 1200 $\mu\text{mol h}^{-1} \text{g}^{-1}$   | [9]       |
| Co <sub>3</sub> O <sub>4</sub> -ZnO@ZnS/Pt                           | 300 W Xe lamp<br>0.35 M Na <sub>2</sub> S/0.18 M Na <sub>2</sub> SO <sub>3</sub>     | 3269.3 $\mu\text{mol h}^{-1} \text{g}^{-1}$ | This work |

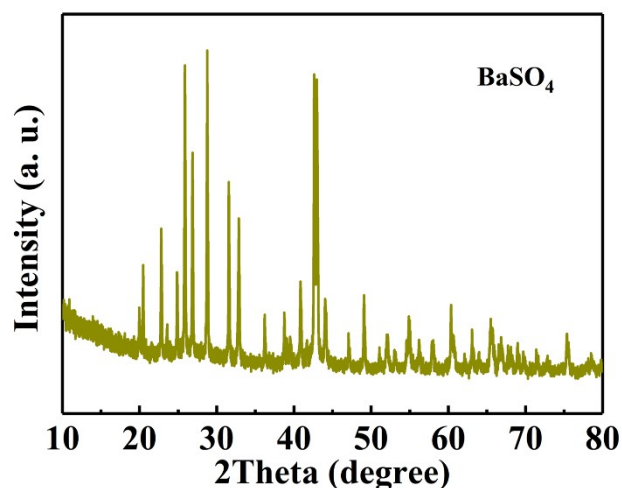

**Fig. S1** The PXRD pattern of the white precipitate obtained from the photocatalytic reaction without using the sacrificial agent.

## References

- 1 M. Lan, R. M. Guo, Y. Dou, J. Zhou, A. Zhou and J. Li, *Nano Energy*, 2017, **33**, 238-246.
- 2 X. Zhou, Y. Fang, X. Cai, S. Zhang, S. Yang, H. Wang, X. Zhong and Y. Fang, *ACS appl. Mater. Inter.*, 2020, **12**, 20579-20588.
- 3 D. Bao, P. Gao, X. Zhu, S. Sun, Y. Wang, X. Li, Y. Chen, H. Zhou, Y. Wang and P. Yang, *Chem. Eur. J.*, 2015, **21**, 12728-12734.
- 4 J. Jose Gil, O. Aguilar-Martinez, Y. Pina-Perez, R. Perez-Hernandez, C. E. Santolalla-Vargas, R. Gomez and F. Tzompantzi, *Renewable Energy*, 2020, **145**, 124-132.
- 5 X. Yang, H. Liu, T. Li, B. Huang, W. Hu, Z. Jiang, J. Chen and Q. Niu, *Int. J. Hydrogen Energy*, 2022, **45**, 26967-26978.
- 6 P. Madhusudan, Y. Wang, B. N. Chandrashekar, W. Wang, J. Wang, J. Miao, R. Shi, Y. Liang, G. Mi and C. Cheng, *Appl. Catal., B*, 2019, **253**, 379-390.
- 7 K. Wang, Z. Xing, M. Du, S. Zhang, Z. Li, S. Yang, K. Pan, J. Liao and W. Zhou, *J. Colloid Interface Sci.*, 2021, **592**, 259-270.
- 8 S. Liu, X. Wang, K. Wang, R. Lv and Y. Xu, *Appl. Surf. Sci.*, 2013, **283**, 732-739.
- 9 C. Chang, K. Huang, J. Chen, K. Chu and M. Hsu, *J. Taiwan Inst. Chem. Eng.*, 2015, **55**, 82-89.
